# Supplementary material for: Clinical implementation of routine whole-genome sequencing for hospital infection control of multi-drug resistant pathogens
Source: bioRxiv or medRxiv preprint supplement (doi:10.1101/2022.05.02.22273921), 2022-05-03
Supplement: Supplementary file [file media-4.pdf]

# Multi-Resistant Organism Genome Sequencing Report

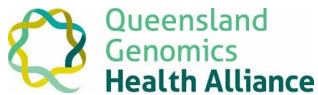

Date:

<Report TITLE>

Executive Summary:

## 1. Isolates:

Table1: Sample information

| Sample ID | URN | Lab No. | sample date | site | Species | MLST (ST) | Hospital | Admission date | Ward |
|-----------|-----|---------|-------------|------|---------|-----------|----------|----------------|------|
|           |     |         |             |      |         |           |          |                |      |
|           |     |         |             |      |         |           |          |                |      |
|           |     |         |             |      |         |           |          |                |      |

MLST = Multi-Locus Sequence Typing; NF =Not found;

## 2. Cluster detection:

See *cathai* for clustering information (<https://cathai.beatsonlab.com>)

This reporting period:

QGHA survey period:

Public databases: not tested.

*Clustered isolates share 5 core genome SNPs per Mb. Other hospitals include RBWH, PAH, QCH (LCCH). QGHA survey period began 01/11/18*

# Multi-Resistant Organism Genome Sequencing Report

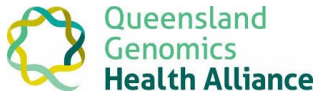

Date:

### 3. Resistance gene profiling:

Table 2: Resistance gene profiles

| Name | Species | MLST (ST) | Hospital | Gene <sup>1</sup> | Gene <sup>2</sup> | ... | Gene <sup>N</sup> |
|------|---------|-----------|----------|-------------------|-------------------|-----|-------------------|
|      |         |           |          |                   |                   |     |                   |
|      |         |           |          |                   |                   |     |                   |
|      |         |           |          |                   |                   |     |                   |

Comments:

Methods:

Analysis: <Name>

Report: <Name>
