# Supplementary material for: Clinical implementation of routine whole-genome sequencing for hospital infection control of multi-drug resistant pathogens
Source: bioRxiv or medRxiv preprint supplement (doi:10.1101/2022.05.02.22273921), 2022-05-03
Supplement: Supplementary file [file media-5.pdf]

**Patient info**

|                             |                  |                 |                   |
|-----------------------------|------------------|-----------------|-------------------|
| <b>Report requested by:</b> | <login ID>       | <b>Date:</b>    | <Date of request> |
| <b>Lab number</b>           | <lab No>         | <b>Hospital</b> | <Hospital>        |
| <b>URN</b>                  | <URN>            | <b>Ward</b>     | <Ward>            |
| <b>DOB</b>                  | <day/month/year> |                 |                   |

**Sample info**

| Sample no     | Sample ID   | Organism  | Sample date   | Isolation site |
|---------------|-------------|-----------|---------------|----------------|
| Max 3/patient | <Sample ID> | <Species> | <Sample date> | <Site>         |
|               |             |           |               |                |
|               |             |           |               |                |

*Other samples from same patient*

|   |            |   |  |
|---|------------|---|--|
| 1 | <Lab No>   | 3 |  |
| 2 | NA if none |   |  |

**Cluster Detection**

**Summary:** Isolate <Lab No> clusters/ does not cluster with previously sequenced isolates

**Cluster ID:** <Cluster ID> Possible include cathai image here

*Caveat: Clustered isolates are assumed to share  $\leq 5$  core genome SNPs per Mb.*

**Antibiotic Resistance Genes**

| Resistance Profile    |                                       |                       |                                       |
|-----------------------|---------------------------------------|-----------------------|---------------------------------------|
| <b>Gram-negatives</b> | <Resistance profile – Gram-negatives> | <b>Gram-positives</b> | <Resistance profile – Gram-positives> |

| Identified Antibiotic/antimicrobial Resistance Genes |                     |
|------------------------------------------------------|---------------------|
| <b>Aminoglycosides</b>                               |                     |
| <b>Beta-lactamases</b>                               |                     |
| <i>Narrow</i>                                        | TEM-1;OXA-1;etc;etc |
| <i>Broad</i>                                         |                     |
| <i>ESBL</i>                                          |                     |
| <i>Carbapenamase</i>                                 |                     |
| <i>AmpC-Type</i>                                     |                     |
| <i>Unknown</i>                                       |                     |
| <b>Fluroquinolones</b>                               |                     |
| <b>etc</b>                                           |                     |
| <b>etc</b>                                           |                     |
